# Supplementary material
Source: publisher figshare collection journal article supplement (https://frontiersin.figshare.com/ndownloader/files/15669941)
Supplement: Supplementary file [file 15669941]

**Table 1: Role of  $\alpha$ -CGRP in various animal model of cardiovascular diseases**

| Disease       | Animal model                                                       | Pathological /molecular changes and CGRP effects                                                                                                                                                                                                                                                            | References                                 |
|---------------|--------------------------------------------------------------------|-------------------------------------------------------------------------------------------------------------------------------------------------------------------------------------------------------------------------------------------------------------------------------------------------------------|--------------------------------------------|
| Heart Failure | $\alpha$ -CGRP KO mice with Transaortic constriction (TAC) surgery | $\alpha$ -CGRP level increased in a compensatory manner in response to heart failure (in TAC WT-mice, CGRP release initially increased that decreased in later stage) TAC hearts in $\alpha$ -CGRP KO mice have decreased FS and EF, and display increased fibrosis, necrosis, apoptosis, and inflammation. | Li et al., 2013                            |
|               | Rats with ascending aortic banding                                 | Increased expression of RAMP1 mRNA and protein in atria and ventricles.                                                                                                                                                                                                                                     | Cuello et al., 2002                        |
|               | Isoprenaline-induced HF in rat                                     | Isoprenaline decreases CGRP production, and induces collagen deposition in heart and enhances cardiac remodeling.                                                                                                                                                                                           | Li et al., 2010                            |
|               | $\alpha$ -CGRP KO mice                                             | Increased systolic blood pressure and arterial pressure in $\alpha$ -CGRP KO mice                                                                                                                                                                                                                           | Gangula et al., 2000                       |
|               | Rat with left coronary artery ligation                             | CGRP induces dilation of blood vessels <i>in vitro</i> isolated from CHF rats                                                                                                                                                                                                                               | Bergdahl et al., 1999                      |
|               | DOC-salt-induced hypertensive rat                                  | Elevated levels of CGRP in the spinal cord and $\alpha$ -CGRP mRNA in the DRG neurons $\alpha$ -CGRP acts as a compensatory depressor to attenuate the rise in BP in DOC-salt rat                                                                                                                           | Supowit et al., 1995                       |
| Hypertension  | Subtotal nephrectomy-induced hypertensive rat                      | $\alpha$ -CGRP acts as a compensatory depressor to attenuate the rise in BP                                                                                                                                                                                                                                 | Supowit et al., 1999                       |
|               | L-NAME-induced hypertension during pregnancy                       | $\alpha$ -CGRP acts as a compensatory depressor to attenuate the rise in BP and infusion of the antagonist, $\alpha$ -CGRP <sub>1-27</sub> increases the elevated blood pressure                                                                                                                            | Gangula et al., 1997                       |
|               | $\alpha$ -CGRP-KO mice                                             | $\alpha$ -CGRP regulate BP under normal physiological condition as BP and mean arterial pressure were significantly higher in $\alpha$ -CGRP-KO mice compared to wild-type mice An increase in the activity of the Plasma RAAS is observed                                                                  | Gangula et al., 2000<br>Li et al., 2004    |
|               | Ang-II induced hypertension                                        | $\alpha$ -CGRP infusion significantly reduces the BP in hypertensive rats, Daily administration of $\alpha$ -CGRP analogue (acylated - $\alpha$ -CGRP) significantly reverse the renal, vascular, and cardiac damage in hypertensive mice induced by Ang-II                                                 | Fujio et al., 1991<br>Aubdool et al., 2017 |
|               | Rats with ischemia reperfusion injury                              | $\alpha$ -CGRP administration significantly reversed myocardial IR injury and decreases infarct size in heart.                                                                                                                                                                                              | Wolfrum et al., 2005                       |
| Ischemia      | $\alpha$ -CGRP KO mice with I/R injury                             | Deletion of $\alpha$ -CGRP makes the heart more vulnerable to I/R injury due to increased oxidative stress and inflammation                                                                                                                                                                                 | Huang et al., 2008                         |
|               | Rats with ischemia reperfusion injury                              | Intravenous infusion of CGRP 10 min before occlusion until the end of reperfusion significantly reduces the infarcted size in heart                                                                                                                                                                         | Wu et al., 2001                            |
